# Supplementary material for: Piezo-responsive bismuth ferrite nanoparticle-mediated catalytic degradation of rhodamine B and pathogenicE. coliin aqueous medium and its extraction using external magnetic stimulation after successful treatment
Source: Royal Society of Chemistry journal article supplement (doi:10.1039/d2dt02918a), 2022-01-01
Supplement: d2dt02918a2.pdf [file d2dt02918a2.pdf]

# **Piezo-responsive bismuth ferrite nanoparticles mediated catalytic degradation of rhodamine-B and pathogenic *E. coli* in aqueous medium and its extraction using external magnetic stimulation after successful treatment**

Jhilik Roy<sup>1,2</sup>, Leenia Mukhopadhyay<sup>3,4</sup>, Souravi Bardhan<sup>1,5</sup>, Dhananjoy Mondal<sup>1</sup>, Saheli Ghosh<sup>1</sup>,  
Sudip Chakraborty<sup>6</sup>, Neelanjana Bag<sup>1</sup>, Shubham Roy<sup>1,7</sup>, Ruma Basu<sup>2\*</sup>, Sukhen Das<sup>1\*</sup>

<sup>1</sup>Department of Physics, Jadavpur University, Kolkata-700032, India

<sup>2</sup>Department of Physics, Jogamaya Devi College, Kolkata- 700026, India

<sup>3</sup>Department of Chemistry, National Institute of Technology, Jamshedpur, India

<sup>4</sup>Department of Civil Engineering, Stony Brook University, New York, USA

<sup>5</sup> Department of Environmental Science, Netaji Nagar College for Women, Kolkata- 700092, India

<sup>6</sup>Condensed Matter Physics Division, Saha Institute of Nuclear Physics, A Cl of Homi Bhabha National Institute, Kolkata-700064, India

<sup>7</sup>Shenzhen Key Laboratory of Flexible Printed Electronics Technology and School of Science, Harbin Institute of Technology, Shenzhen-518055, China

## **Supporting information**

### **\*Corresponding Authors:**

Prof. Sukhen Das

[sdasphysics@gmail.com](mailto:sdasphysics@gmail.com) (+91 9433091337)

Dr. Ruma Basu

[ruma.b1959@gmail.com](mailto:ruma.b1959@gmail.com) (+91 8697841665)

### S1. DFT optimized structure of the BFO nanoparticle

|    |    |    |    |                |              |              |
|----|----|----|----|----------------|--------------|--------------|
| Bi | 0  | 0  | 0  | 0.000000000000 | 0.00000000   | 0.00000000   |
| Bi | 1  | 0  | 0  | 3.529691456332 | 0.00000000   | 0.00000000   |
| Bi | 2  | 1  | 0  | 3.712706735644 | 89.71821833  | 0.00000000   |
| Bi | 3  | 2  | 1  | 3.532825550519 | 90.35136264  | 0.00000000   |
| Bi | 1  | 2  | 3  | 3.481037717722 | 90.05628637  | 254.95622765 |
| Bi | 2  | 1  | 3  | 3.464317233366 | 89.93792212  | 105.04791976 |
| Bi | 3  | 2  | 1  | 3.532814720092 | 74.63259388  | 89.90320707  |
| Bi | 4  | 3  | 2  | 3.532842785039 | 89.97982471  | 74.67263468  |
| Bi | 8  | 4  | 3  | 2.805859683395 | 61.13961255  | 315.56806094 |
| Fe | 5  | 1  | 2  | 1.525308439300 | 42.56954489  | 39.89214362  |
| Fe | 3  | 2  | 1  | 1.184897300191 | 49.41744615  | 56.23991164  |
| O  | 10 | 5  | 1  | 1.350878106492 | 84.11034855  | 314.85167642 |
| H  | 12 | 10 | 5  | 0.970002244791 | 109.47153372 | 4.28763252   |
| O  | 5  | 1  | 2  | 1.047186723799 | 116.97868084 | 57.46083258  |
| H  | 14 | 5  | 1  | 0.970005015142 | 149.04284660 | 74.83211156  |
| O  | 12 | 10 | 5  | 1.290795516997 | 67.16398733  | 239.40091005 |
| H  | 16 | 12 | 10 | 0.969994026889 | 85.88793839  | 244.10514473 |
| O  | 13 | 12 | 10 | 1.155832700437 | 114.46651324 | 48.43504325  |
| H  | 18 | 13 | 12 | 0.970001483762 | 172.24233091 | 336.88212153 |
| O  | 10 | 5  | 1  | 1.013848603787 | 141.69578084 | 107.36508146 |
| H  | 9  | 8  | 4  | 0.828764996968 | 66.80225552  | 174.38064245 |
| O  | 20 | 10 | 5  | 1.137041664012 | 75.60672717  | 202.68383176 |
| H  | 17 | 16 | 12 | 0.730458381908 | 108.60677450 | 26.87772051  |
| O  | 11 | 3  | 2  | 1.577885689934 | 89.42113582  | 102.97611269 |
| H  | 24 | 11 | 3  | 0.970001913142 | 109.47109598 | 282.70068262 |
| O  | 3  | 2  | 1  | 1.191871086360 | 78.46809399  | 311.16307991 |
| H  | 26 | 3  | 2  | 0.969995399474 | 151.80327534 | 62.55519248  |

|   |    |    |   |                |              |              |
|---|----|----|---|----------------|--------------|--------------|
| O | 7  | 3  | 2 | 1.102180049085 | 35.25882077  | 342.37933383 |
| H | 28 | 7  | 3 | 0.969998541184 | 91.76191533  | 213.85713315 |
| O | 3  | 2  | 1 | 1.117259820812 | 109.47740740 | 163.74715188 |
| H | 30 | 3  | 2 | 0.969998355308 | 76.68937500  | 116.79235976 |
| O | 29 | 28 | 7 | 0.891583517849 | 64.82548798  | 151.06915070 |
| H | 9  | 8  | 4 | 0.264656832332 | 65.61119137  | 33.50149178  |
| O | 11 | 3  | 2 | 1.425160026137 | 112.43805097 | 280.87703221 |
| H | 27 | 26 | 3 | 0.710782867056 | 104.93900473 | 349.01702931 |

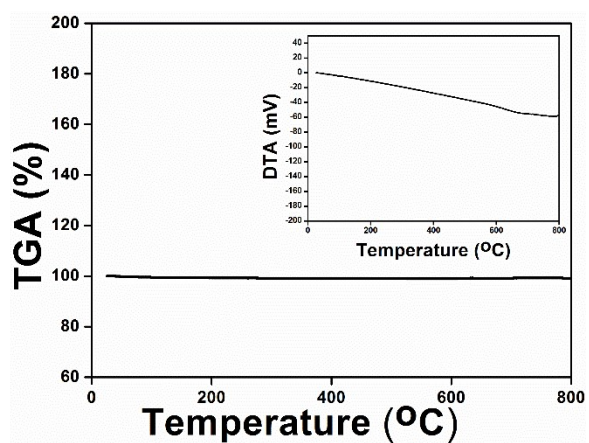

**Fig. S1** TGA and DTA (inset) thermograms of BFO nanoparticles showing the thermal stability of the material
